# Supplementary material for: Evaluation of a coupled ocean and sea-ice model (MOM6-NEP10k) over the Bering Sea and its sensitivity to turbulence decay scales
Source: Copernicus journal article supplement (doi:10.5194/egusphere-2025-1229), 2025-05-13
Supplement: Supplementary file 1 [file egusphere-2025-1229-supplement.pdf]

Supplementary Figures

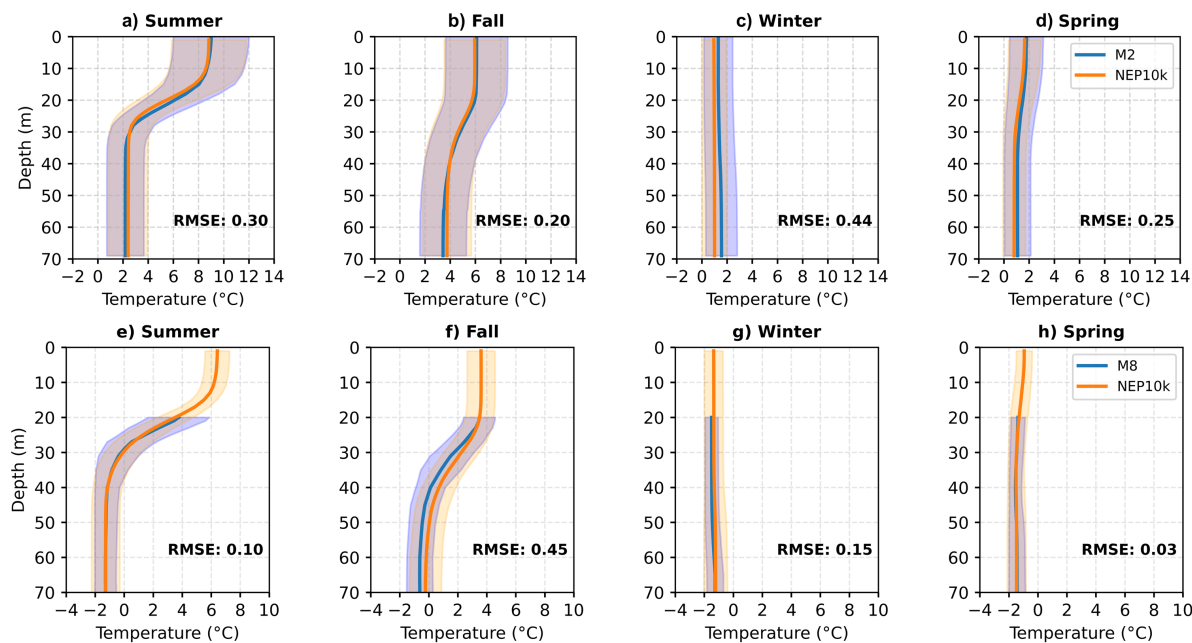

Figure S1: Seasonal variations of temperature with depth at (a-d) M2 and (e-h) M8 with their respective standard deviations (shading). All correlation values are significant ( $p < 0.001$ ).

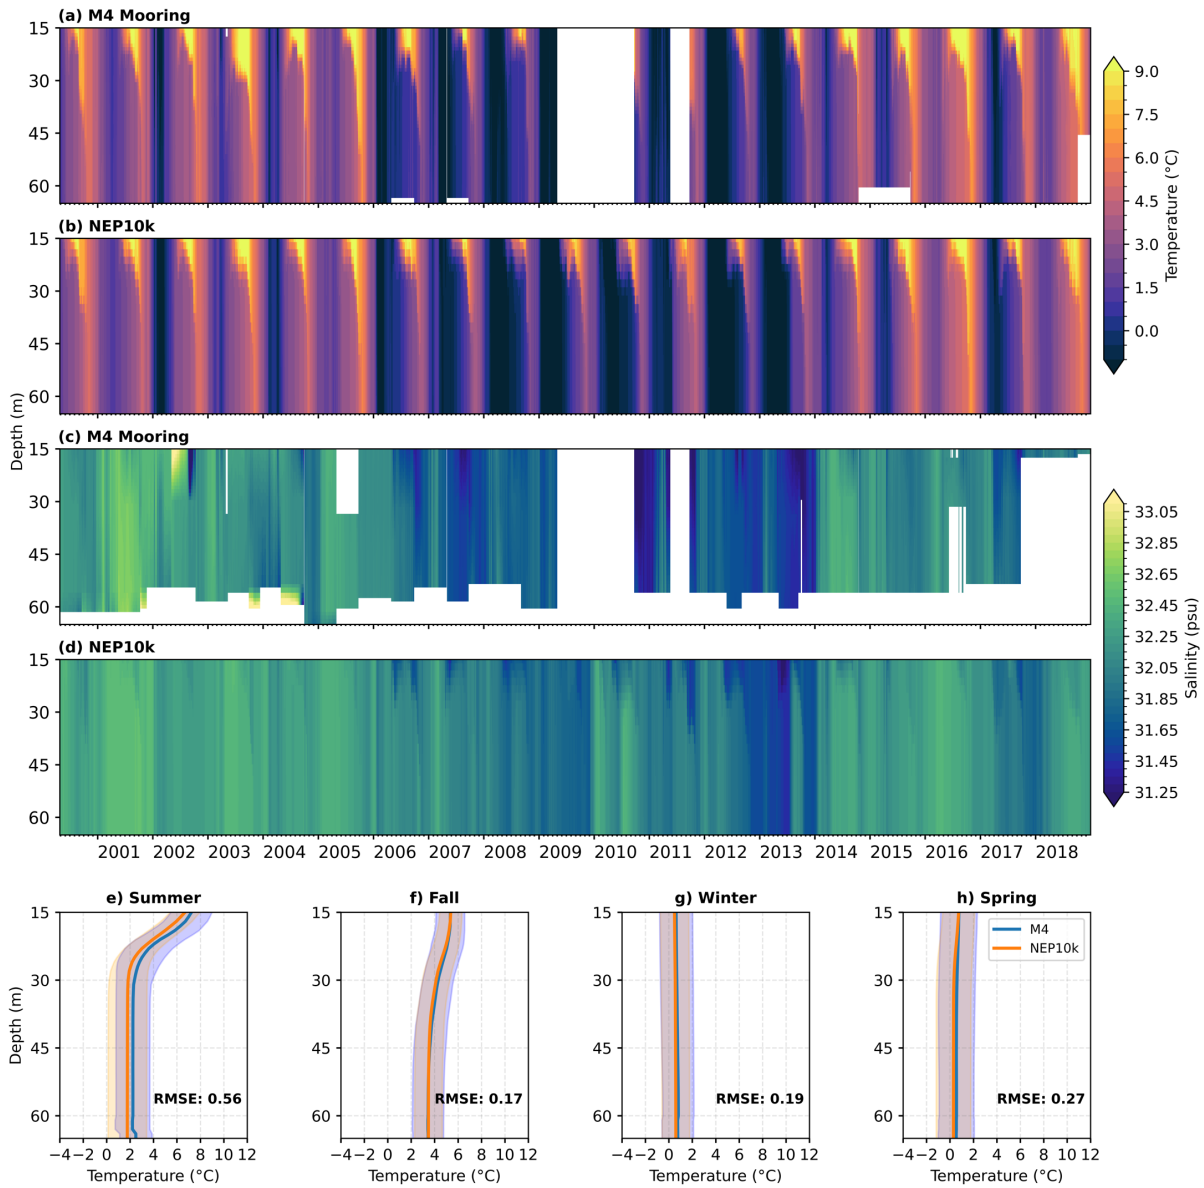

**Figure S2: Depth versus time contours of temperature for (a) observations and (b) model, and salinity for (c) observations and (d) model, and seasonal variations of temperature with depth (e-h) at M4 mooring with their respective standard deviations (shading).**

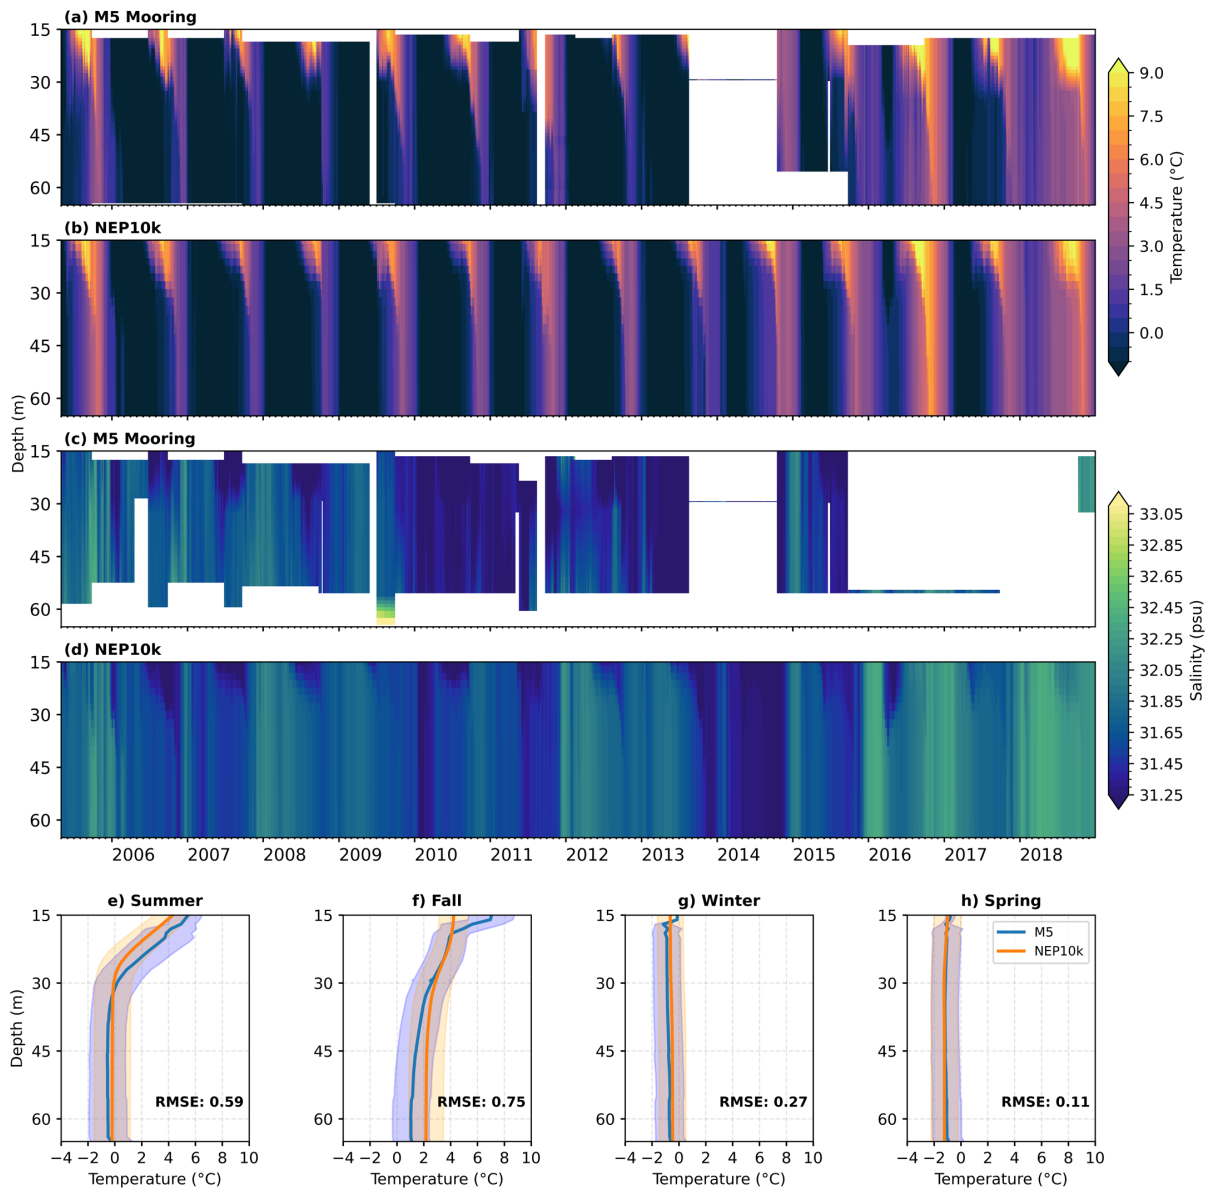

**Figure S3:** As in Figure S2, except for M5.

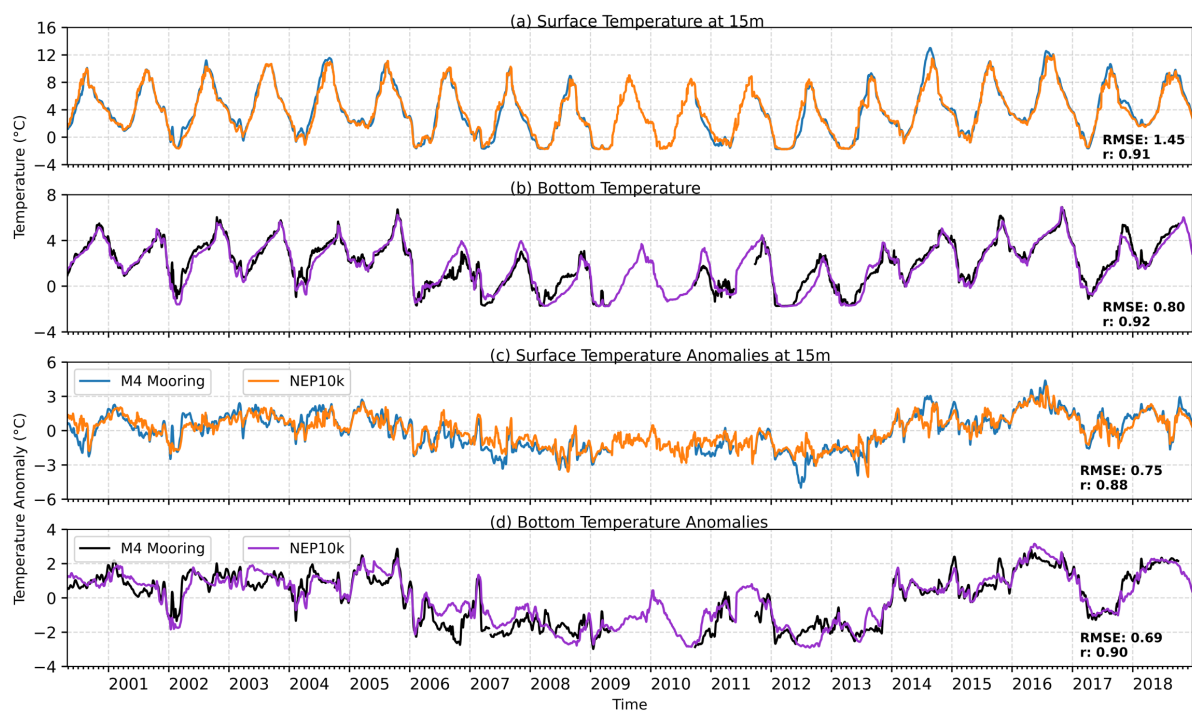

**Figure S4:** Same as in Fig. 14 except for M4.

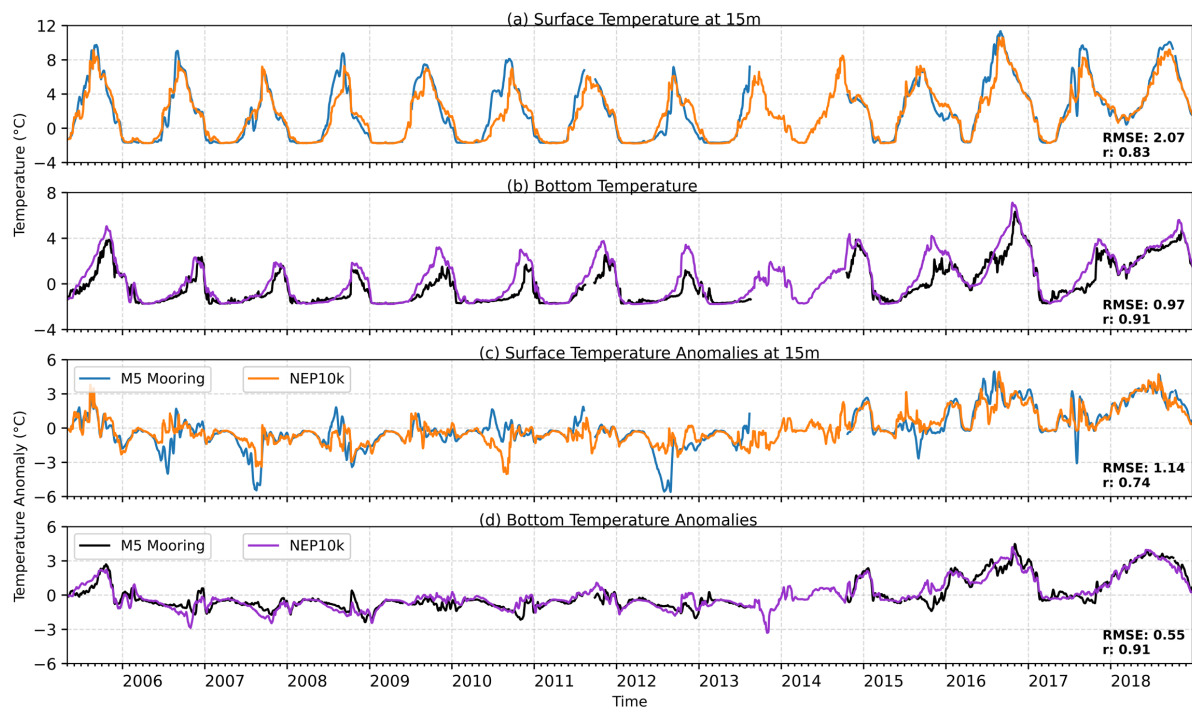

**Figure S5:** Same as in Fig. 14 except for M5.

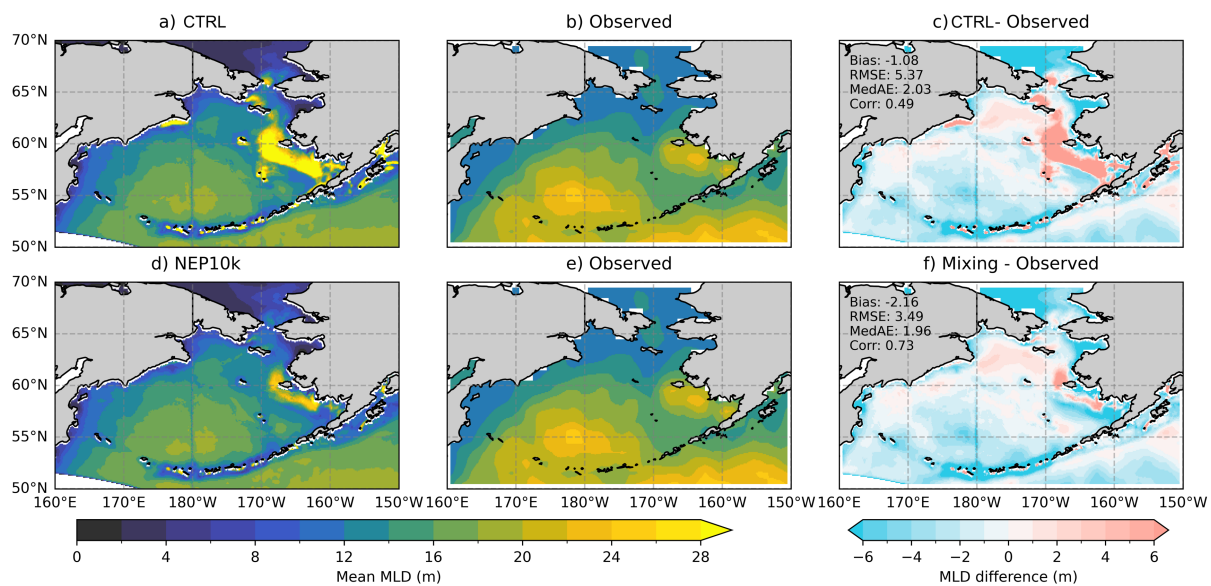

**Figure S6: June-July-August mean mixed layer depth from (a) the CTRL simulation, (b) observations, (c) CTRL minus observations, (d) MOM6-NEP10KP1.1, (e) observations, and (f) MOM6-NEP10KP1.1 minus observations.**
